# Supplementary material for: N-Myc and STAT Interactor regulates autophagy and chemosensitivity in breast cancer cells
Source: PubMed Central journal article supplement (PMC4648342; doi:10.1038/srep11995), 2015-07-06
Supplement: srep11995-s1.pdf [file srep11995-s1.pdf]

**N-Myc and STAT Interactor regulates autophagy and chemosensitivity in breast cancer cells.**

Brandon J. Metge<sup>1</sup>, Aparna Mitra<sup>4</sup>, Dongquan Chen<sup>1,2,3</sup>, Lalita A. Shevde<sup>1,2</sup>, Rajeev S. Samant<sup>1,2†</sup>

**Running title:** NMI regulates autophagy

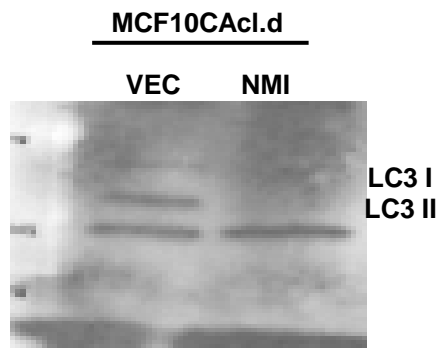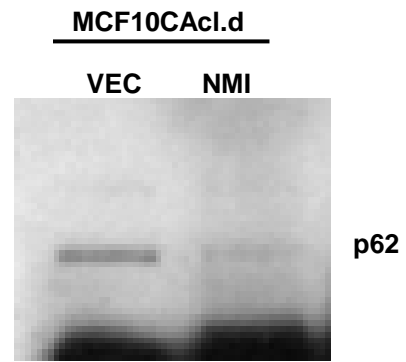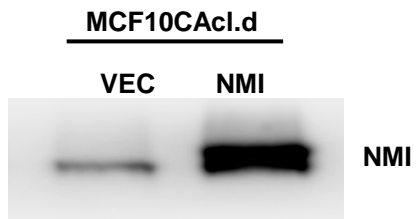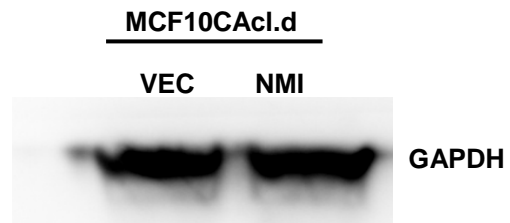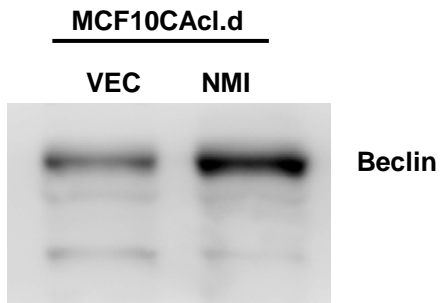

Supplementary Figure 1

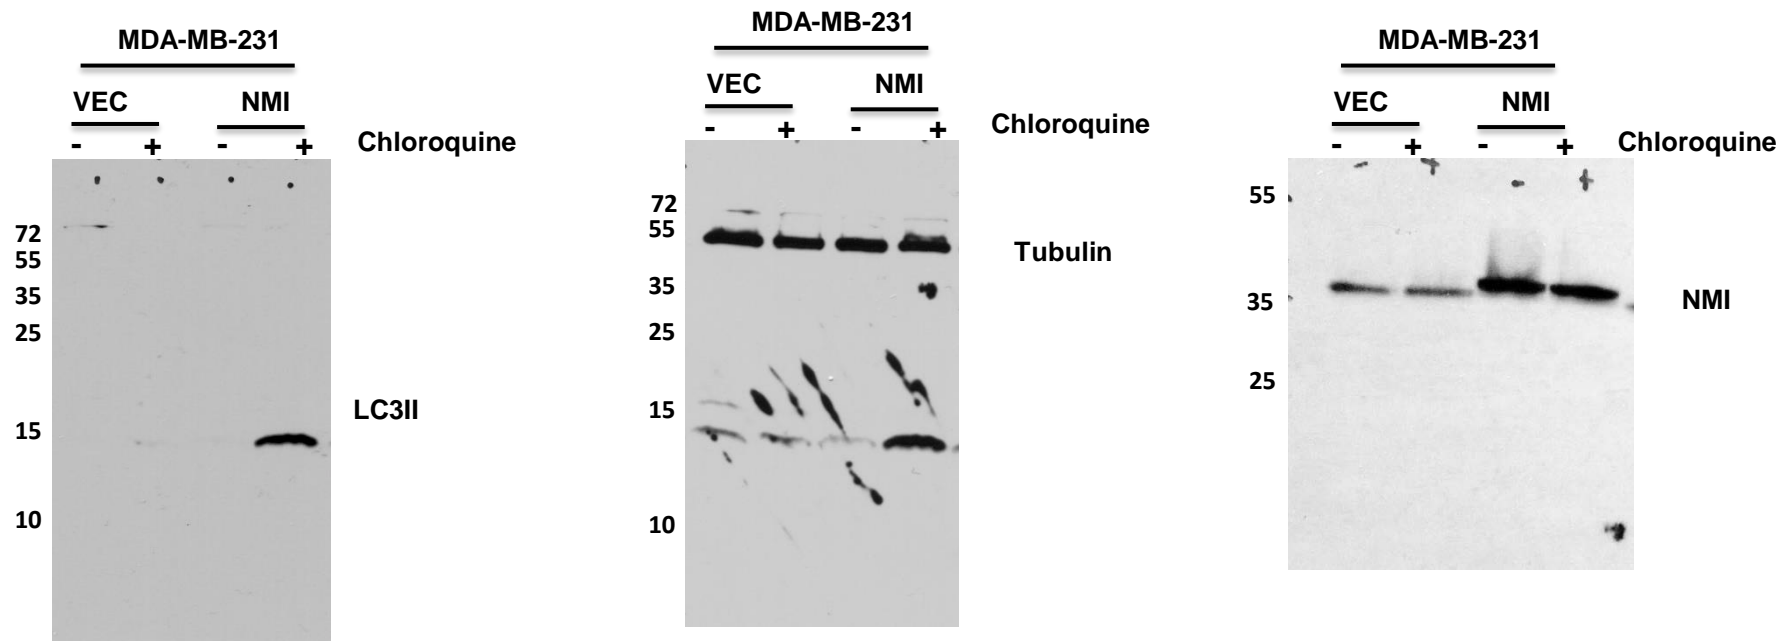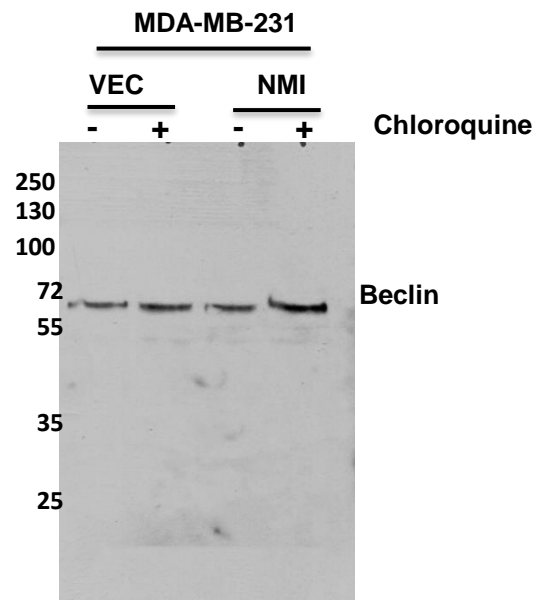

Supplementary Figure 2

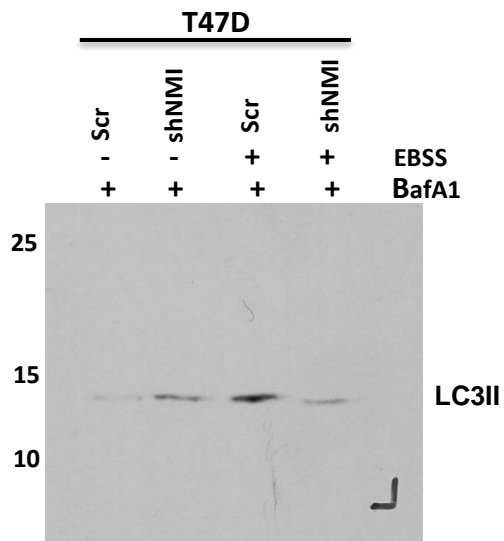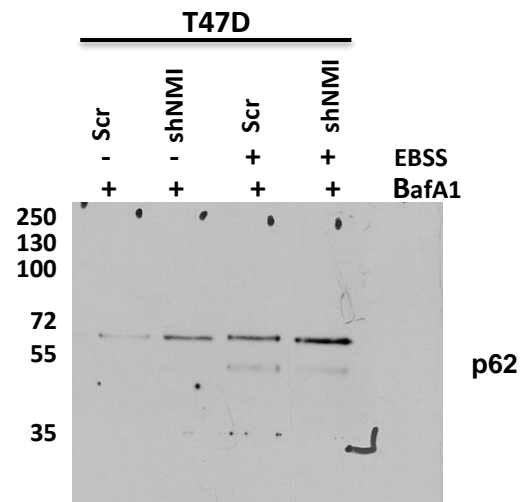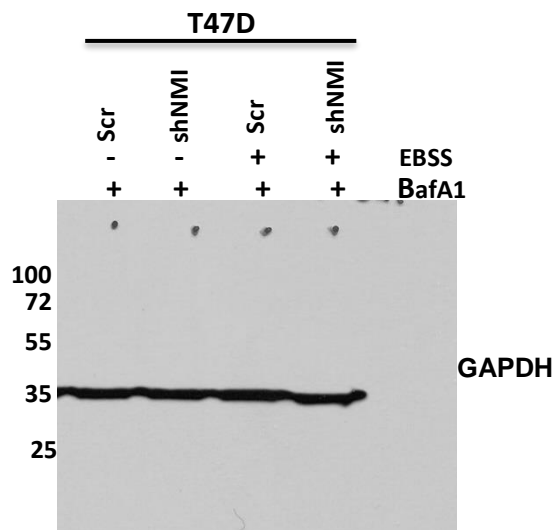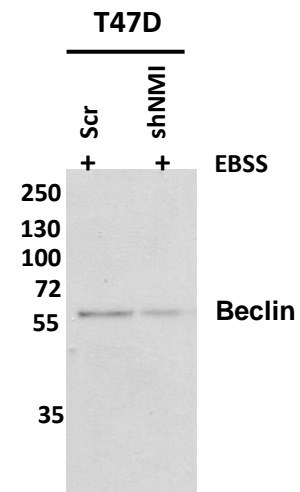

Supplementary Figure 3

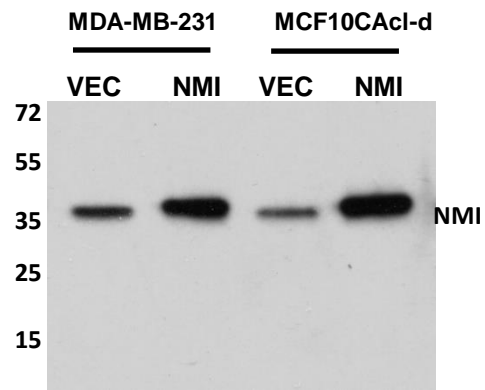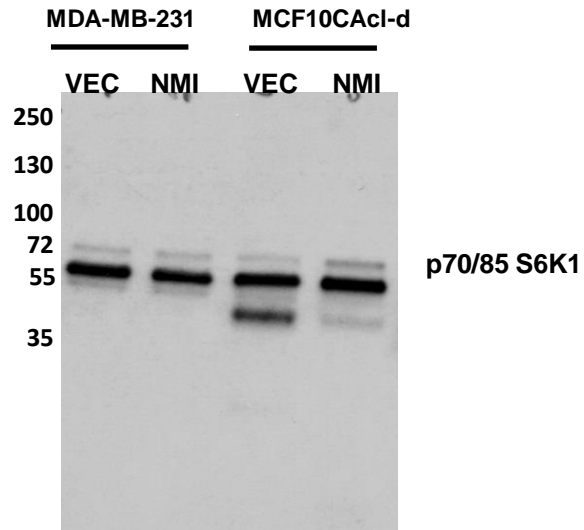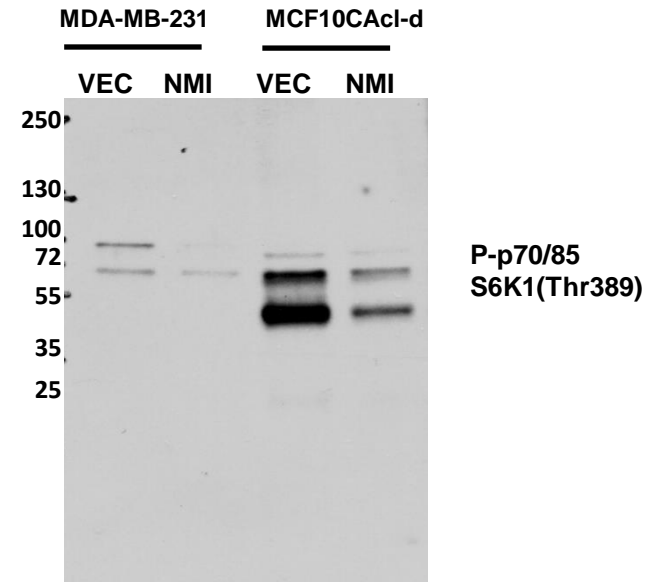

Supplementary Figure 4

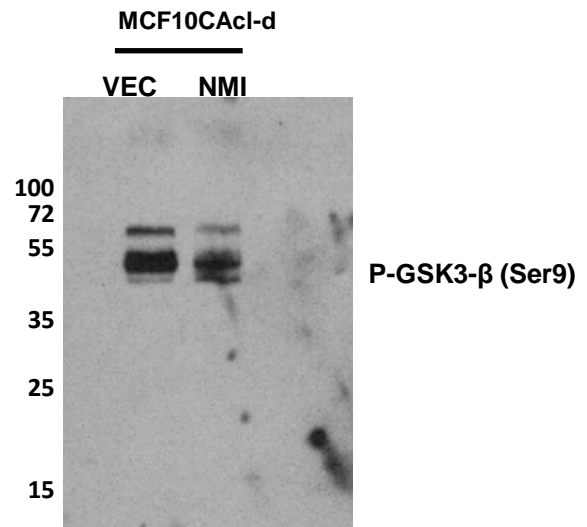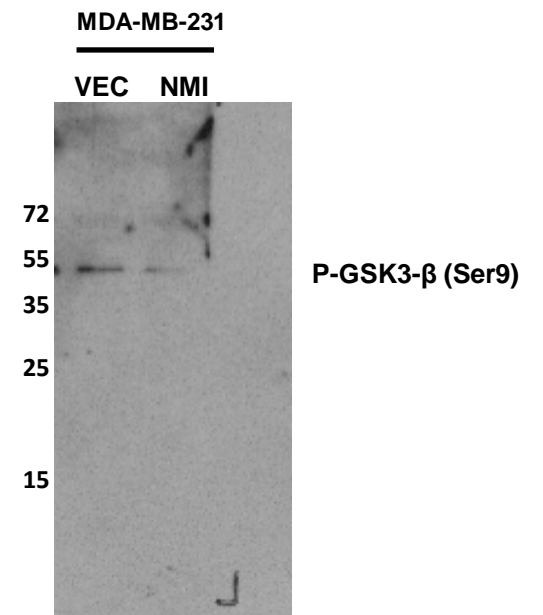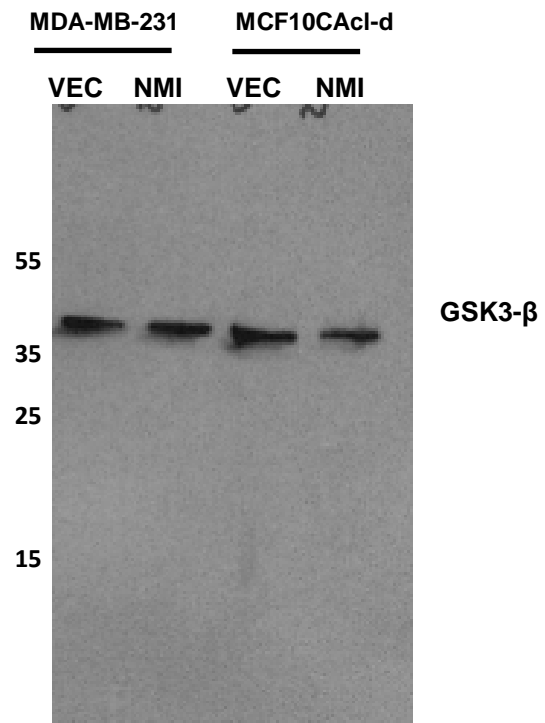

Supplementary Figure 5

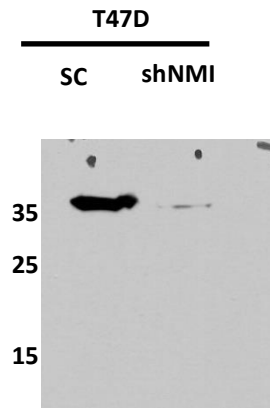

NMI

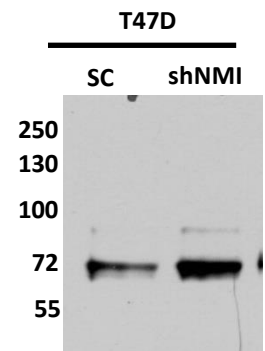

P-p70/85  
S6K1(Thr389)

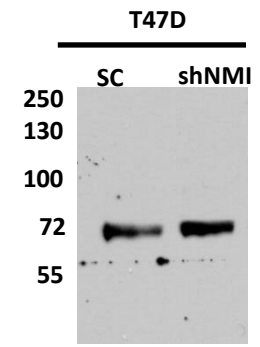

p70/85 S6K1

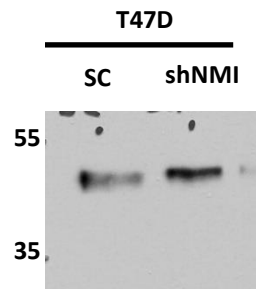

P-GSK3-β (Ser9)

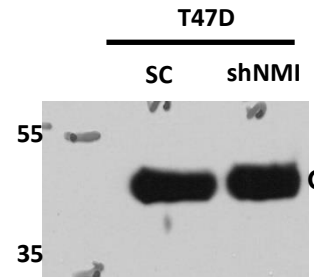

GSK3-β

Supplementary Figure 6

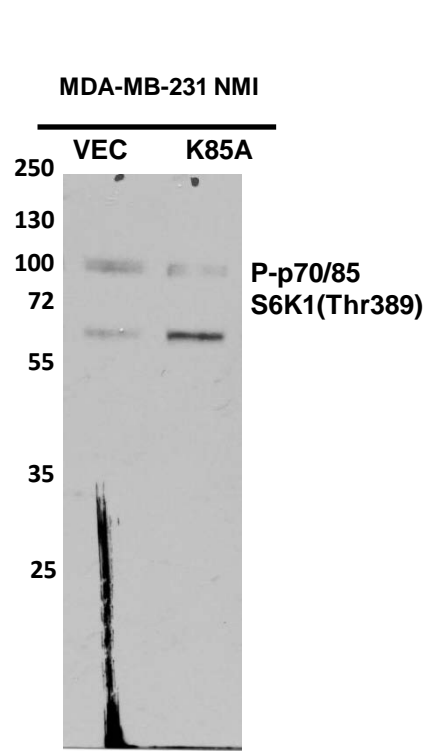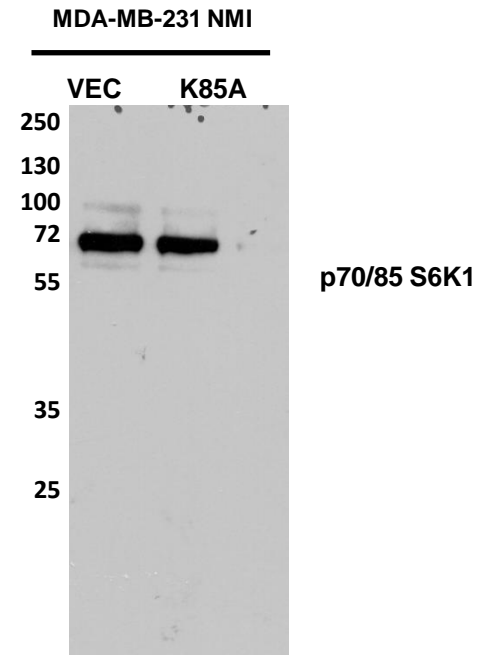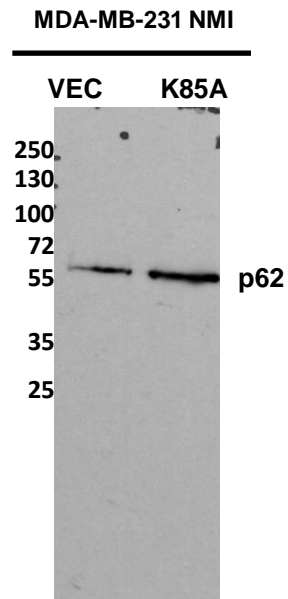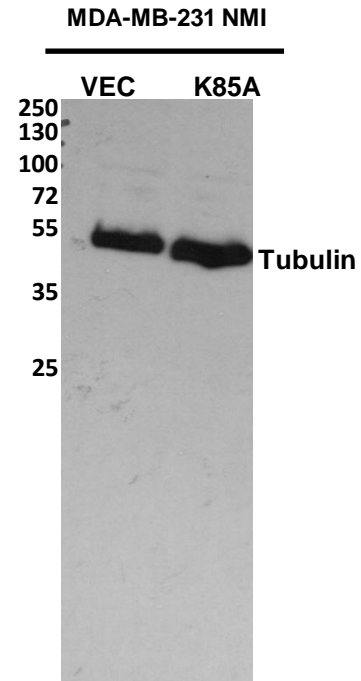

Supplementary Figure 7



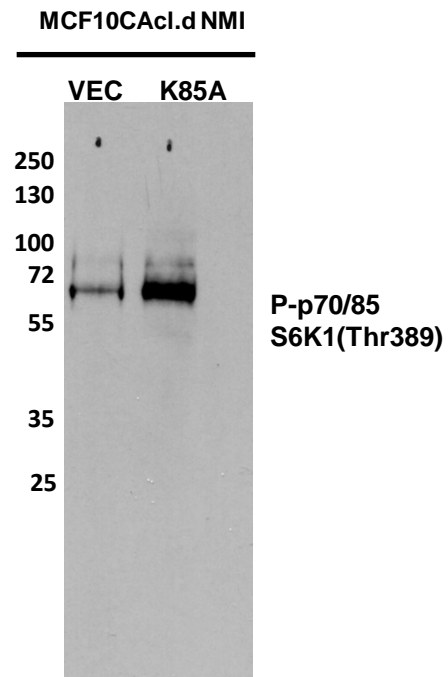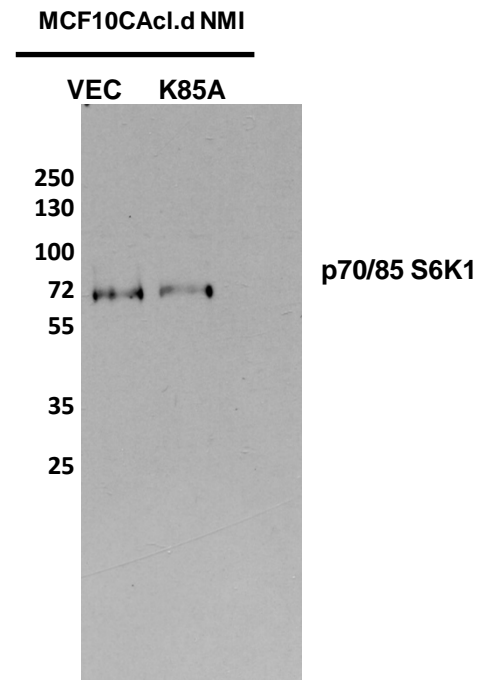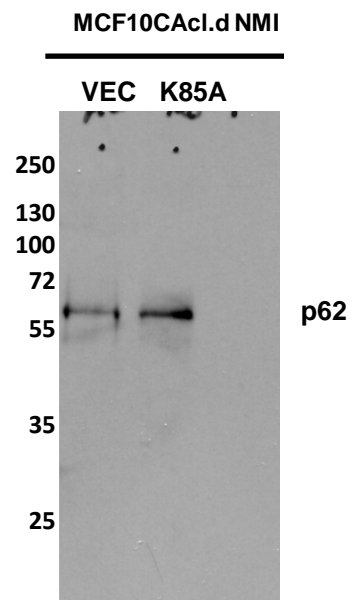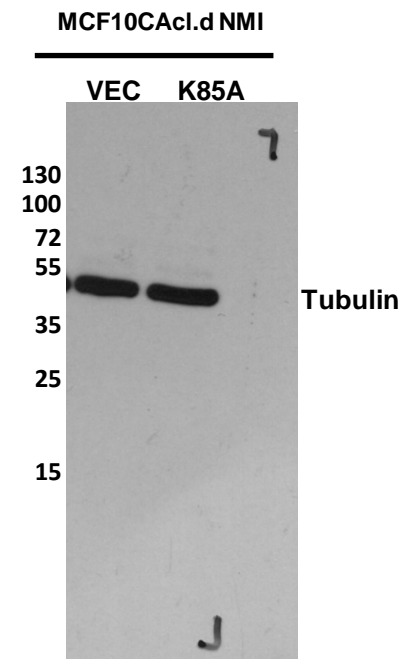

Supplementary Figure 8

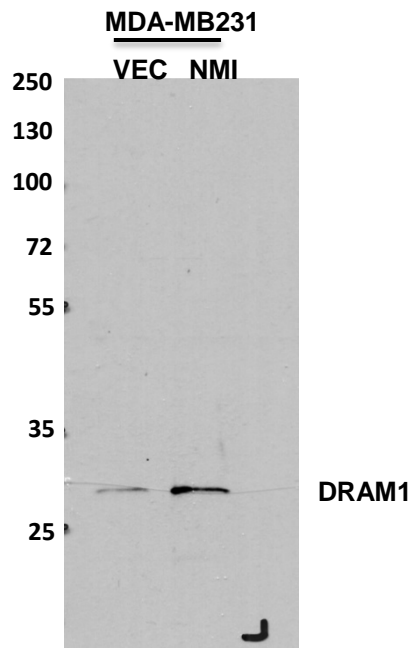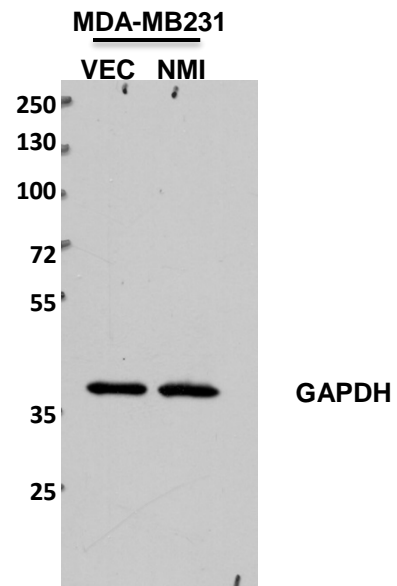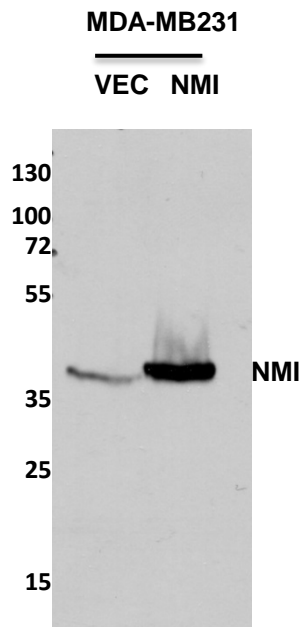

Supplementary Figure 9

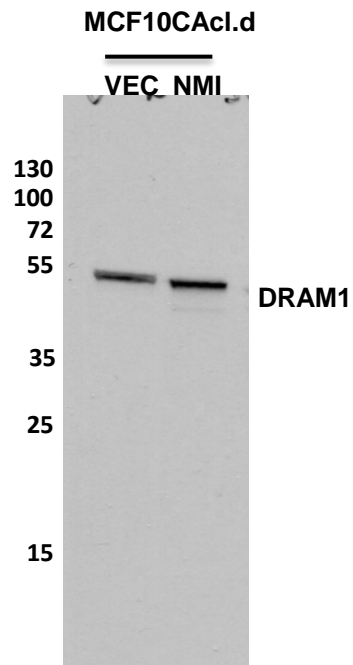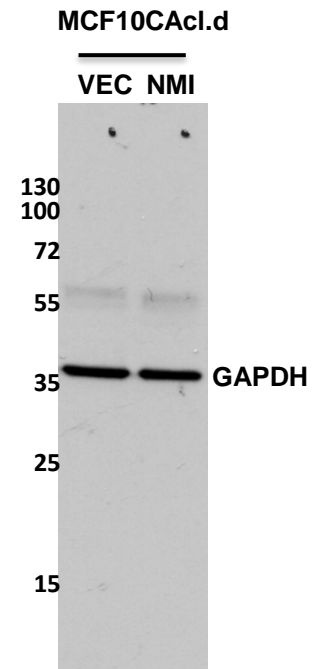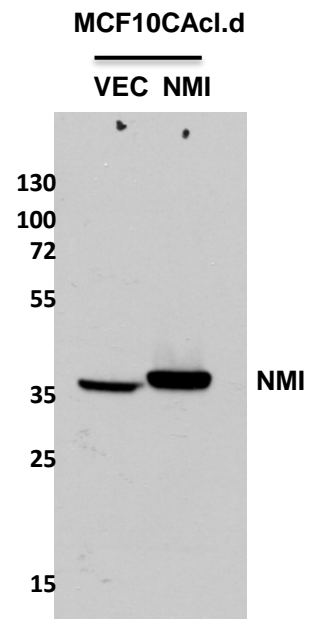

Supplementary Figure 10

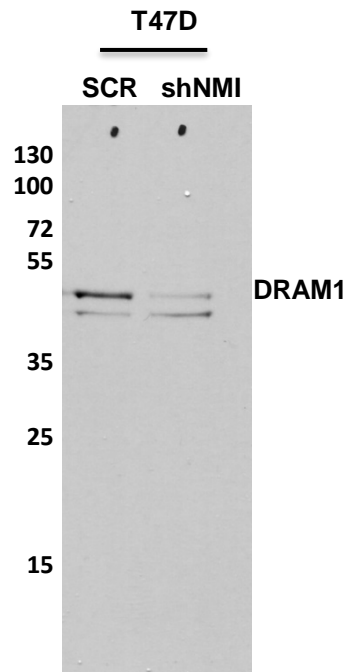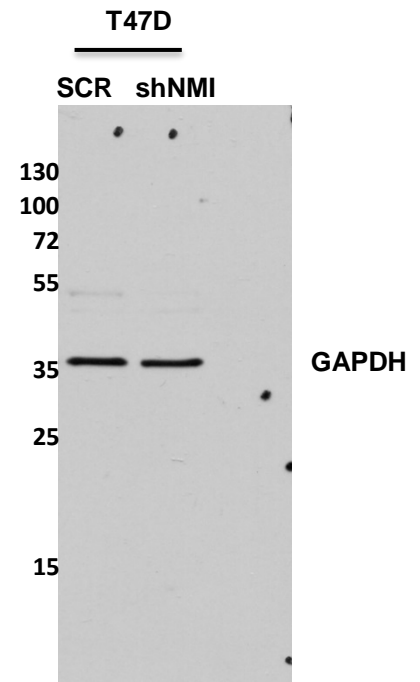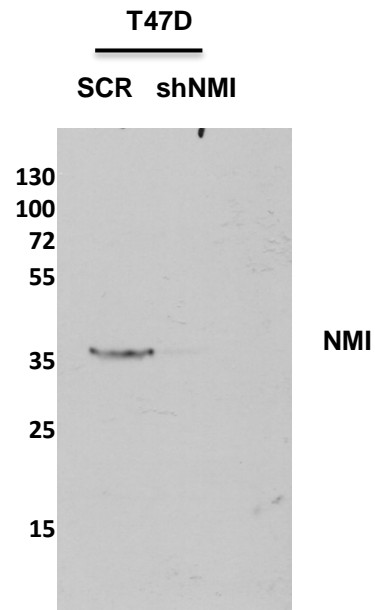

Supplementary Figure 11

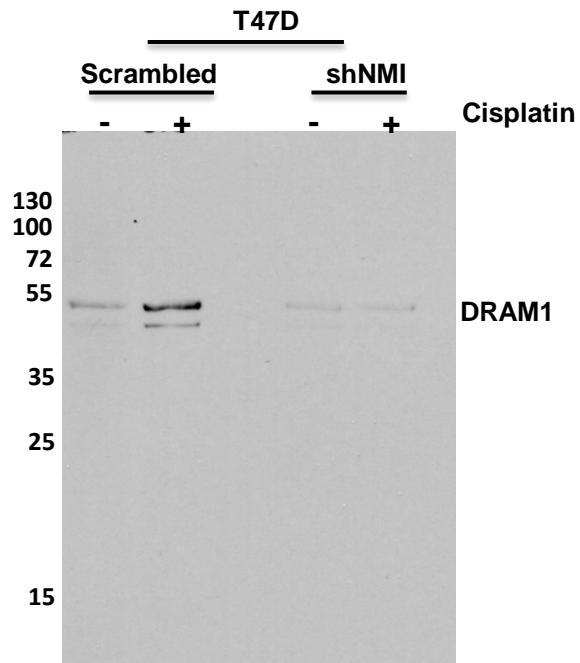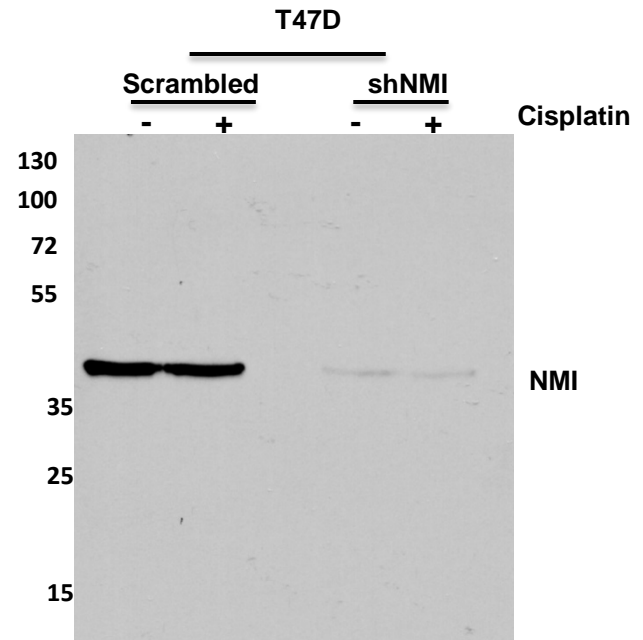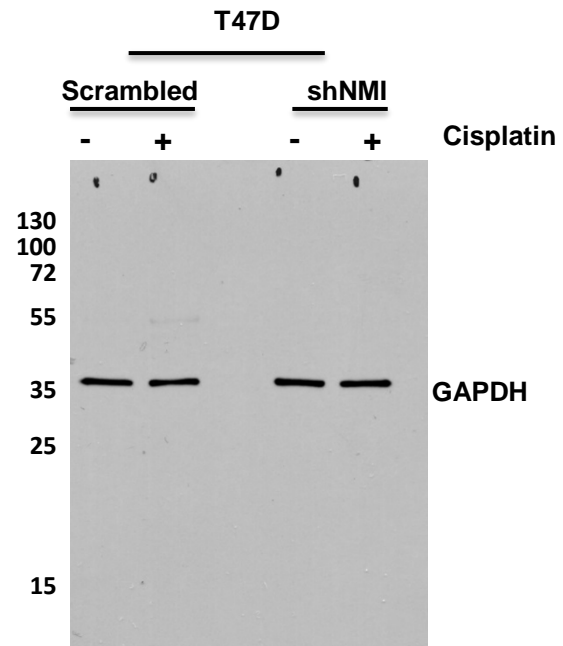

Supplementary Figure 12

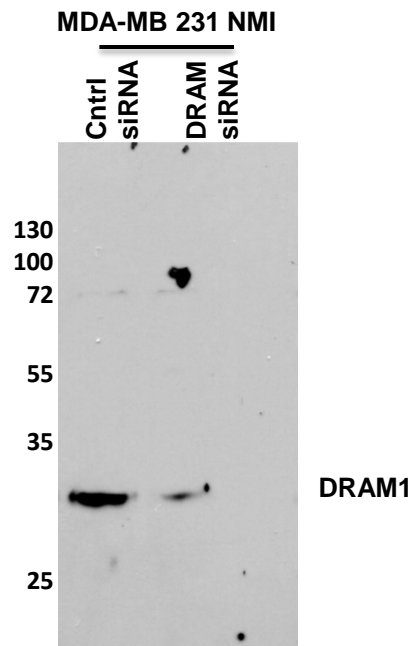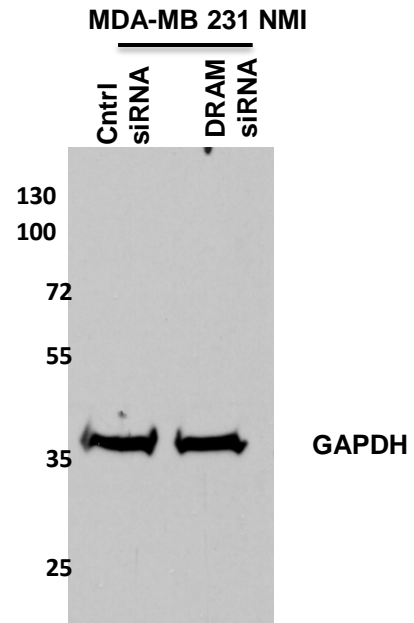

Supplementary Figure 13
